# Supplementary material
Source: PubMed Central journal article supplement (PMC1748163)

### Igrov 1

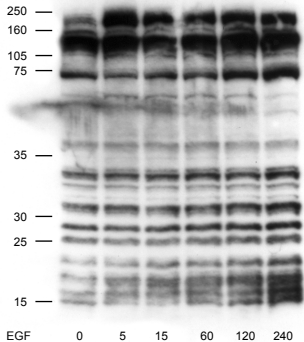

**WB:**

### Igrov/S5

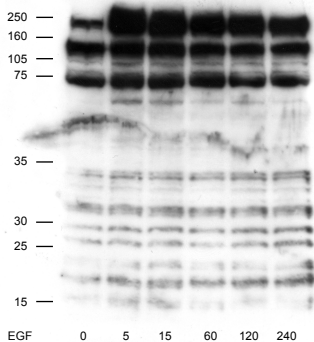

**PY**

Supplement: pnas_0605821103_1.pdf [file pnas_0605821103_1.pdf]
